# Supplementary material for: The first study on the impact of osmolytes in whole cells of high temperature-adapted microorganisms
Source: Royal Society of Chemistry journal article supplement (doi:10.1039/c9sm01196j), 2019-01-01
Supplement: c9sm01196j1.zip [file c9sm01196j1.zip]

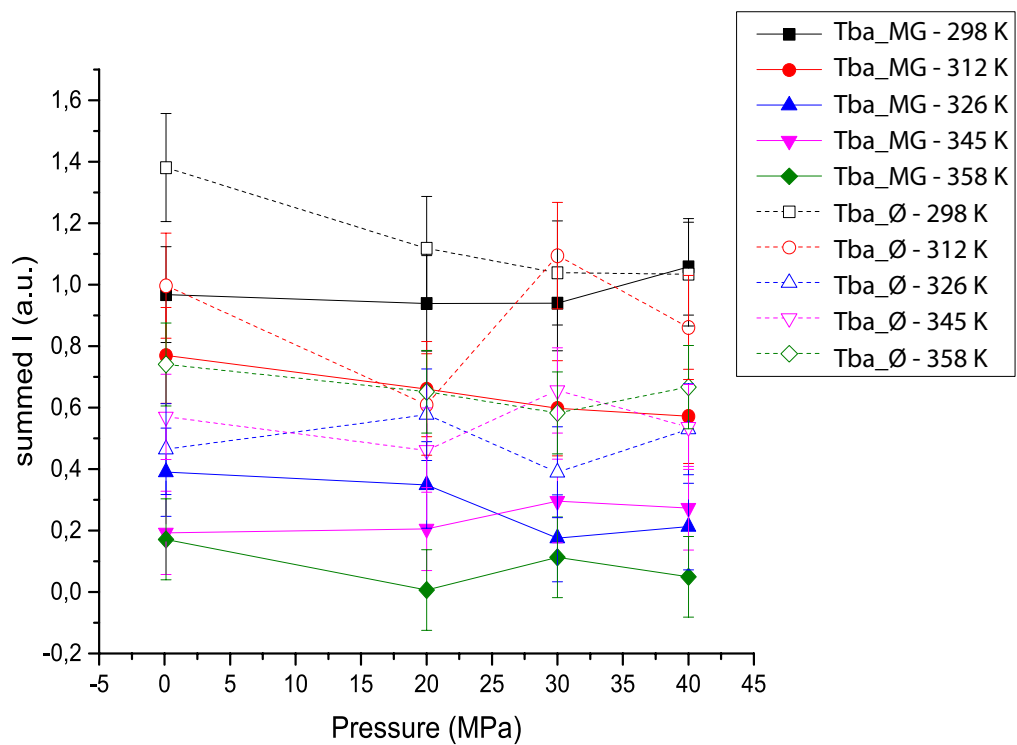

**Figure S1.** Summed Intensities plotted against pressure for Tba\_MG (filled symbols) and Tba\_Ø (empty symbols) at different temperatures : 298 K (black squares), 312 K (red circles), 326 K (blue up triangles), 345 K (magenta down triangles) and 358 K (green diamonds).
