# Supplementary material for: The first study on the impact of osmolytes in whole cells of high temperature-adapted microorganisms
Source: Royal Society of Chemistry journal article supplement (doi:10.1039/c9sm01196j), 2019-01-01
Supplement: c9sm01196j1.zip [file c9sm01196j1.zip]

a

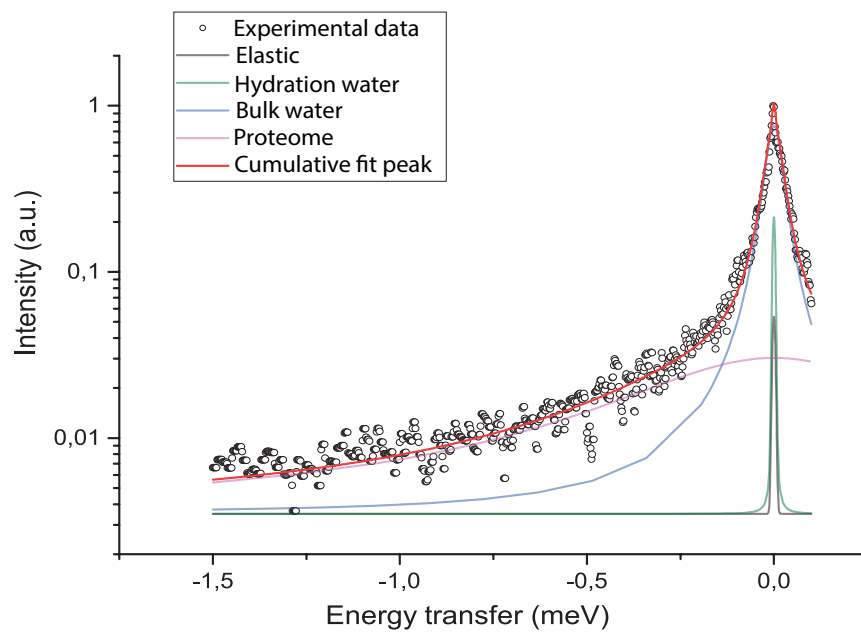

b

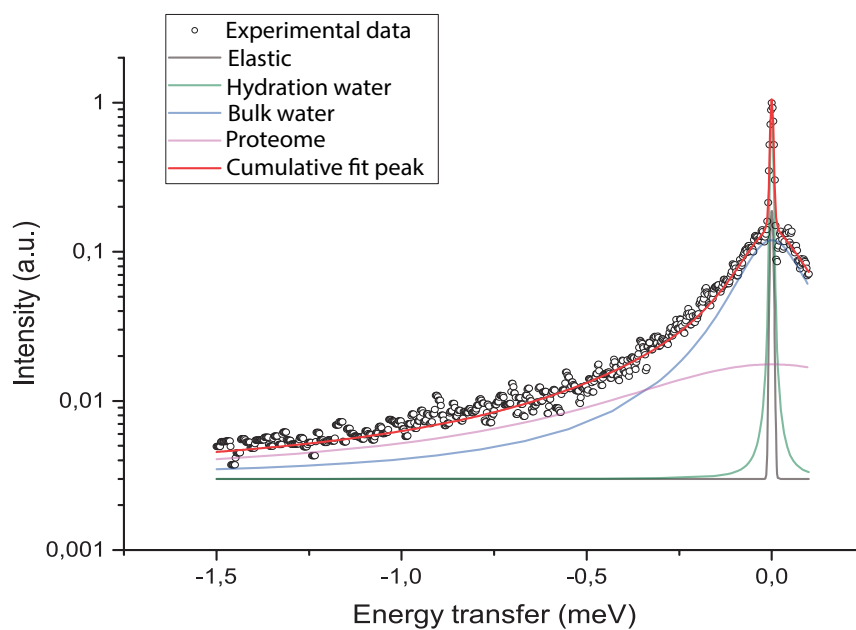

**Figure S8.** Normalized QENS spectra and fit for Tba\_Ø at 298 K, 40 MPa,  $Q= 0.46 \text{ \AA}^{-1}$  (a) and  $Q= 0.96 \text{ \AA}^{-1}$  (b) on a semi-logarithmic scale.
